# Supplementary material for: Harnessing the maximum reinforcement of graphene oxide for poly(vinylidene fluoride) nanocomposites via polydopamine assisted novel surface modification
Source: Royal Society of Chemistry journal article supplement (doi:10.1039/c6ra12997h), 2016-01-01
Supplement: c6ra12997h1.pdf [file c6ra12997h1.pdf]

## SUPPORTING INFORMATION

### **Harnessing the maximum reinforcement of graphene oxide for Polyvinylidene fluoride nanocomposite via polydopamine assisted novel surface modification**

Sunanda Roy,<sup>†</sup> Tanya Das,<sup>‡\*</sup>, Liying Zhang and Xiao ‘Matthew’ Hu<sup>†\*</sup>

**Table S1.** Elemental composition of GO, PDT-DA, AA-rGO and *f*-rGO obtained from XPS analysis.

| Sample        | Surface composition (at. %) |       |      |      |
|---------------|-----------------------------|-------|------|------|
|               | C                           | O     | N    | S    |
| GO            | 68.8                        | 31.20 | -    | -    |
| PDT-DA        | 67.63                       | 18.55 | 8.64 | 5.18 |
| AA-rGO        | 81.31                       | 8.97  | 9.72 | -    |
| <i>f</i> -rGO | 63.40                       | 23.25 | 9.21 | 4.14 |

**Table S2.** Comparison of tensile test values for PVDF-graphene nanocomposites between our sample and earlier reported results.

| Reference                                                    | Sample                                                                    | Preparation process                                                                       | Filler content ( % wt) | % increment in T.S       | % increment in Young's Modulus |
|--------------------------------------------------------------|---------------------------------------------------------------------------|-------------------------------------------------------------------------------------------|------------------------|--------------------------|--------------------------------|
| Our results                                                  | f-rGO/PVDF nanocomposites                                                 | Solution casting followed by melt mixing                                                  | 0.4                    | 51<br>(47-70.8 MPa)      | 37<br>(556-761.6 MPa)          |
| <i>J. Appl. Polym. Sci.</i> 2013, <b>127</b> , 4697.         | rGO nanosheet /PVDF nanocomposite                                         | Melt mixing                                                                               | 0.5                    | 36<br>(43.1-58.6 MPa)    | 25 %<br>(1302.4-1624.4 MPa)    |
| <i>J. Mater. Chem.</i> 2011, <b>21</b> , 15752.              | PMMA coated-MWCNT/ PVDF nanocomposites                                    | Solution casting                                                                          | 0.5                    | 37.6<br>(10.1- 13.9 MPa) | 4.7<br>(1260-1320 MPa)         |
| <i>Appl. Surf. Sci.</i> 2012, <b>258</b> , 7668.             | GO nanosheets/ PVDF nanocomposites                                        | Solution casting                                                                          | 2                      | 48<br>(41-79 MPa)        | 137<br>(1462-3467 MPa)         |
| <i>Macromol. Mater. Eng.</i> 2008, <b>293</b> , 188.         | PVDF homopolymer/1.25 ppm maleic anhydride grafted PVDF/CNT nanocomposite | Solution mixing followed by co-precipitation                                              | 2.5                    | 28<br>(47.6- 60.8 MPa)   | 31<br>(1.06-1.39 GPa)          |
| <i>Chem. Res. Chinese Universities</i> 2010, <b>26</b> , 491 | PVDF/CNT                                                                  | Ultrasonic dispersion of PVDF and CNT into dimethylacetamide followed by solution casting | 2                      | 12<br>(43-48 MPa)        | 89<br>(1414-2675 MPa)          |

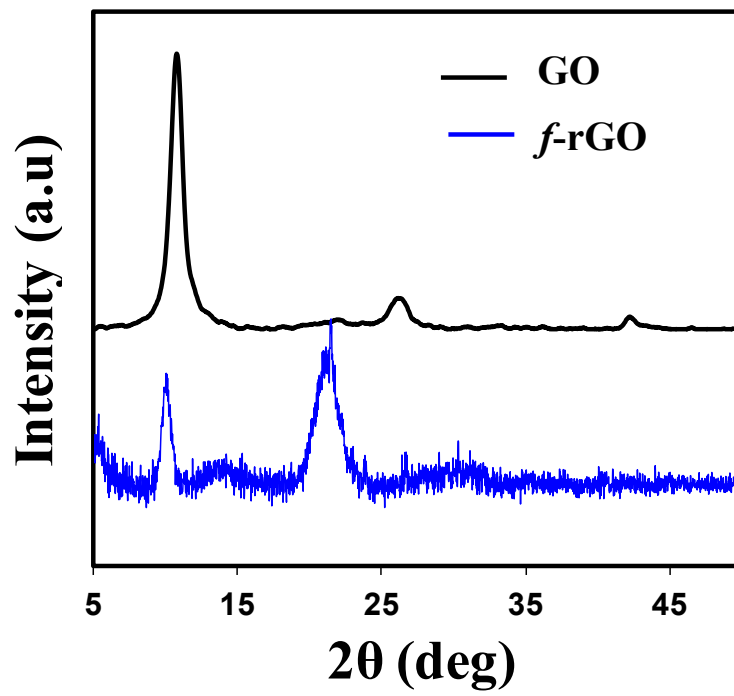

Fig. S1 XRD patterns of GO and *f*-rGO.

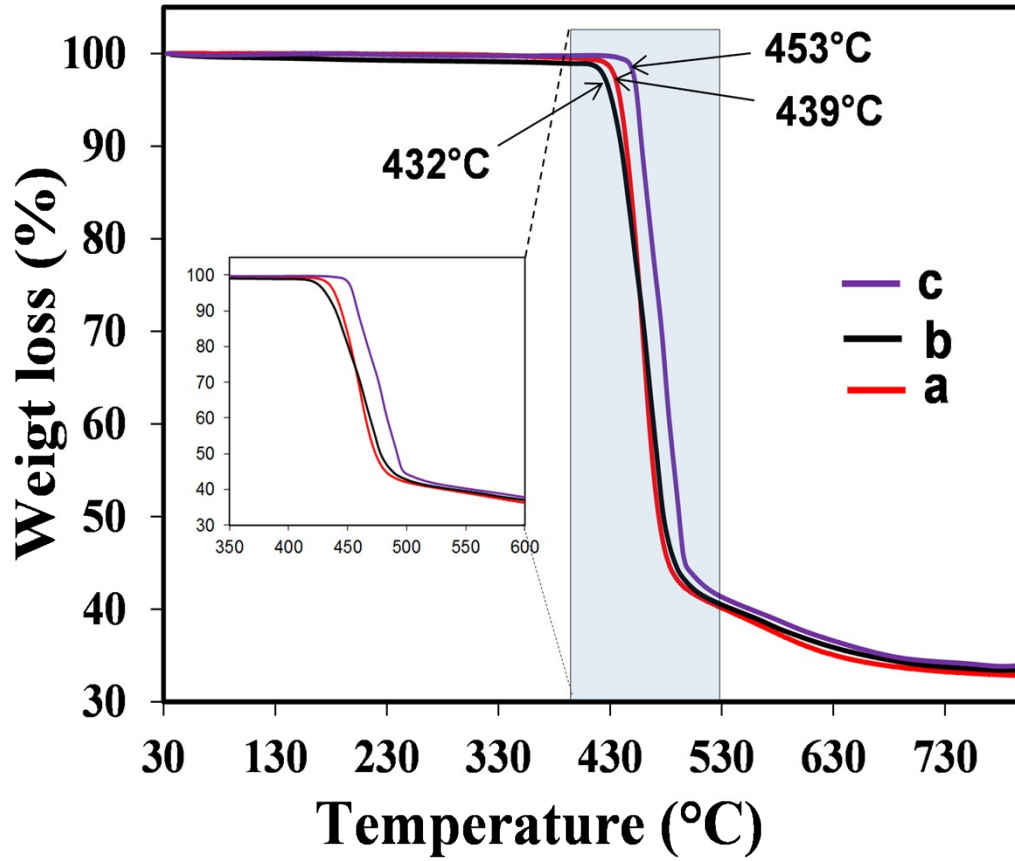

**Fig. S2** TGA profiles of (a) PVDF (b) 0.4 wt% GO/PVDF nanocomposite and (c) 0.4 wt% *f*-rGO/PVDF nanocomposite under the nitrogen gas condition. Temperature values given in the curve are taken at degradation temperatures for 5% ( $T_5$ ). Inset shows the same TGA curves with a more magnified area of the curve for better clarification.
